# Supplementary material for: Perceptual fluency and eye movements when viewing urban and natural scenes
Source: Research Square preprint supplement (doi:10.21203/rs.3.rs-5848316/v1), 2025-05-06
Supplement: Supplementary file 1 [file dcbe76d23078d11baa96255c.xlsx]

## Sheet: number of fixations
gender	age	Bare1	Bare2	Bare3	Bare4	Bare5	Bare6	Bare7	Bare8	Foliage1	Foliage2	Foliage3	Foliage4	Foliage5	Foliage6	Foliage7	Foliage8	City1	City2	City3	City4	City5	City6	City7	City8
Female	23	80	44	38	62	64	54	71	55	70	57	64	55	48	51	58	54	56	62	57	51	61	54	44	37
Female	22	31	26	44	38	33	35	30	38	33	30	37	31	37	33	30	34	33	36	27	41	32	28	35	31
Female	21	41	37	44	35	45	33	40	31	32	46	38	43	49	35	50	35	30	37	47	49	40	37	37	51
Female	20	44	40	44	29	52	34	29	49	42	43	35	34	40	39	57	47	52	50	35	50	50	39	59	41
Female	20	28	33	23	42	40	32	35	33	30	30	43	28	44	26	37	34	53	32	33	30	43	29	40	43
Female	21	27	20	30	35	22	32	28	14	28	30	34	22	22	23	23	22	26	23	31	32	25	29	33	37
Female	20	76	79	79	45	55	68	22	43	26	68	30	47	57	43	32	51	39	84	57	33	39	58	56	64
Female	22	25	28	23	20	28	23	23	23	28	20	26	25	27	28	29	29	26	30	29	26	30	31	28	28
Male	23	50	44	40	48	65	34	27	42	45	68	38	42	50	42	67	56	44	51	40	55	39	40	47	44
Male	19	73	77	68	53	64	57	31	69	86	53	57	45	74	68	69	50	62	68	82	34	55	42	43	61
Male	20	66	82	68	45	54	52	37	63	65	56	80	51	41	61	42	47	59	61	41	54	49	38	48	43
Female	19	35	21	39	26	35	16	30	23	31	36	27	50	32	16	28	23	21	31	33	37	42	19	44	32
Male	19	41	40	40	40	104	57	44	41	46	48	32	83	96	92	23	86	57	47	76	40	43	46	46	57
Female	20	29	46	30	33	69	37	83	40	44	33	31	37	39	31	39	35	34	30	37	35	29	34	30	39
Female	24	30	25	36	29	28	28	28	28	33	32	36	29	29	31	32	32	32	34	33	27	35	36	24	33
Female	21	77	54	42	54	63	41	61	62	75	50	45	57	67	50	53	55	37	34	31	44	32	49	48	58
Female	21	31	60	22	21	6	17	19	24	22	26	24	33	37	18	43	15	38	29	23	22	22	14	26	34
Male	22	39	28	21	27	28	37	29	37	30	27	28	27	28	31	32	39	39	42	40	30	33	28	35	34
Female	23	60	31	33	29	47	35	30	62	34	36	27	33	16	40	46	40	42	5	27	30	33	31	38	34
Female	21	29	23	24	30	31	24	29	30	31	24	22	41	26	35	30	25	20	31	23	28	31	40	44	34
Female	23	31	38	36	29	25	32	32	37	33	36	36	31	33	34	28	36	35	40	30	37	33	32	38	33
Female	21	39	39	26	46	66	63	56	37	36	67	65	58	77	47	51	27	37	55	42	77	57	31	67	43
Male	20	40	24	31	41	54	42	51	66	32	32	35	36	28	38	26	47	48	37	31	40	38	39	46	50
Female	20	59	45	34	30	34	54	37	50	37	55	57	33	29	55	38	34	39	65	36	39	36	41	28	34
Male	20	28	31	33	31	17	28	34	25	26	30	35	30	29	24	34	25	25	33	31	34	26	32	37	33
Male	19	47	39	60	39	32	71	35	72	37	65	50	34	50	27	50	59	73	61	53	31	50	33	66	45
Female	21	24	27	24	29	32	30	34	31	36	30	37	22	33	35	45	36	41	33	35	39	38	36	35	34
Female	22	28	28	34	17	29	27	28	22	21	32	28	40	17	28	19	34	33	20	32	34	50	29	28	31
Female	21	19	20	12	20	27	17	23	22	25	16	7	10	8	33	11	6	26	23	36	28	10	28	18	34
Male	21	35	36	39	54	68	40	53	59	35	27	44	56	32	47	47	24	30	44	51	64	28	46	36	57
Female	21	27	27	27	28	22	24	30	34	23	40	24	31	34	30	33	35	32	34	23	33	26	18	11	37
Female	21	27	27	19	27	33	18	27	27	27	13	20	28	27	28	23	27	28	29	32	28	25	26	25	29
Male	17	47	38	61	32	66	38	32	51	49	46	66	35	55	49	46	36	23	57	27	48	49	51	63	41
Male	20	30	35	27	19	41	28	47	41	40	25	29	36	40	28	29	39	35	51	33	40	41	45	39	44
Female	22	56	74	59	73	71	57	71	70	78	64	64	81	63	58	82	68	69	77	85	74	84	81	62	72
Female	20	26	38	40	33	30	57	33	25	24	37	30	35	13	38	33	45	37	26	42	40	41	45	44	48
Female	19	34	45	50	29	6	40	27	38	39	31	20	21	38	27	8	9	32	38	11	41	35	22	41	40
Male	20	94	87	95	100	102	87	76	89	81	99	95	86	85	89	100	76	93	95	87	89	88	92	83	87
Female	20	57	40	43	39	32	27	48	50	35	21	55	45	39	40	28	24	27	46	31	48	41	62	24	60
Female	20	95	100	84	78	92	71	65	95	86	78	84	95	89	78	84	93	74	93	75	89	50	91	85	72
Male	19	53	50	47	32	30	27	22	38	49	12	25	32	25	28	39	29	35	61	30	49	38	26	41	32
Male	20	36	42	18	44	46	39	37	30	35	48	40	26	48	33	47	43	41	43	42	59	52	49	51	47
Female	29	30	28	28	32	36	31	31	26	40	27	26	25	32	27	41	32	29	19	25	28	32	34	29	34
Male	19	27	31	28	23	13	26	19	28	34	14	13	21	26	19	43	21	14	27	29	36	21	14	30	27
Male	20	40	35	34	36	70	29	55	44	38	35	32	35	28	47	29	25	33	36	26	29	42	36	37	32
Male	23	44	44	32	40	20	29	37	30	24	29	35	38	30	28	31	27	65	43	30	54	41	57	51	53
Female	20	46	39	20	34	35	45	34	38	41	61	43	42	61	43	40	30	60	48	39	29	44	58	51	57
Female	21	27	40	27	18	32	19	27	27	30	32	32	29	23	18	23	22	27	31	30	34	30	41	36	32
Male	19	60	80	35	50	80	56	44	71	8	49	57	52	44	56	49	49	47	43	65	55	54	58	56	70
Male	19	39	32	28	31	43	28	38	28	38	35	33	31	34	32	31	32	32	27	34	32	32	32	41	32
Male	21	25	37	31	39	39	40	31	28	28	34	36	30	33	38	34	27	41	60	39	34	46	57	42	39
Female	21	27	27	23	29	22	19	26	26	26	25	23	24	23	24	25	22	26	33	30	31	33	26	36	28
Female	21	57	35	23	45	18	29	33	47	33	42	41	45	23	26	46	40	33	18	46	54	37	36	40	38
Male	21	33	48	34	32	39	48	56	43	36	47	50	46	32	55	52	51	41	35	40	49	56	45	47	58
Male	20	51	36	62	31	66	10	43	30	24	73	24	57	32	32	50	48	33	69	49	51	38	53	21	50
Female	24	39	35	48	48	52	54	31	49	48	58	32	45	42	33	56	50	32	70	46	40	54	70	72	50
Female	22	55	31	34	31	49	46	25	26	43	33	41	23	59	38	68	38	39	47	44	44	29	32	45	38
Female	21	52	28	34	44	33	41	33	44	47	43	45	45	37	42	39	41	51	50	28	54	31	44	33	30
Female	20	27	29	25	26	32	28	29	23	24	24	27	28	20	29	29	29	27	31	29	30	32	30	28	38
Female	21	29	41	31	33	29	27	36	29	32	33	36	33	28	27	34	29	28	32	27	38	37	34	38	42
Female	20	37	60	26	38	47	38	45	50	39	33	52	36	45	35	35	46	29	26	47	71	38	48	49	39
Female	21	20	31	28	36	34	15	22	34	18	41	44	17	28	20	24	22	28	27	34	26	26	24	41	30
Female	20	29	29	39	31	40	35	39	44	41	31	28	34	31	47	36	34	43	42	36	44	48	49	38	45
Male	21	30	36	25	31	34	30	34	22	34	23	27	39	29	36	26	24	21	27	24	40	28	33	33	36
Male	20	43	44	49	40	36	36	41	56	57	53	43	51	47	52	48	47	33	47	61	58	40	40	39	45
Male	20	33	45	32	50	34	31	32	40	37	34	43	37	39	38	54	25	26	28	40	55	45	39	34	41

## Sheet: fixation duration
gender	age	Bare1	Bare2	Bare3	Bare4	Bare5	Bare6	Bare7	Bare8	Foliage1	Foliage2	Foliage3	Foliage4	Foliage5	Foliage_6	Foliage7	Foliage8	City1	City2	City3	City4	City5	City6	City7	City8
female	24	63	70	111	89	85	63	64	71	65	79	73	102	107	60	88	86	101	95	88	120	81	103	113	126
female	21	185	247	138	163	183	175	220	165	190	208	168	213	168	179	213	189	192	166	239	144	201	226	175	198
female	21	150	168	112	176	135	193	143	220	191	123	165	135	116	182	111	166	219	155	102	117	142	169	156	117
female	21	120	159	158	214	128	195	228	125	127	142	156	198	162	156	100	133	107	118	193	119	121	160	107	144
female	21	221	172	235	132	126	175	168	188	180	193	127	185	133	240	151	157	99	187	165	188	119	220	160	139
female	21	235	271	211	149	289	191	223	502	248	178	211	317	261	270	282	324	265	283	217	213	217	238	195	183
female	25	67	59	49	134	96	74	291	149	242	76	169	118	94	96	178	107	150	56	89	171	153	85	100	78
female	21	266	234	302	353	246	306	285	295	225	339	258	272	246	213	234	222	264	221	220	222	228	212	241	242
male	23	120	131	145	116	77	185	260	153	130	72	158	143	96	133	83	88	125	107	149	94	151	153	123	142
female	20	68	60	82	104	82	95	208	72	61	114	110	138	55	64	74	101	91	81	62	153	108	103	62	92
male	19	83	59	56	136	87	102	174	83	83	79	60	115	154	88	151	125	90	86	144	105	113	162	120	140
female	20	163	259	162	246	140	426	201	285	135	150	235	106	179	371	184	255	274	195	183	161	145	346	124	205
female	20	161	160	159	158	36	91	149	156	138	129	200	50	40	41	296	54	103	128	69	161	136	139	134	104
female	21	192	131	199	193	67	174	47	157	136	169	185	168	163	191	164	176	180	204	166	181	227	183	201	148
female	20	219	273	176	230	237	242	243	242	191	203	182	230	221	212	208	202	203	183	197	251	187	183	287	197
female	22	66	113	153	107	95	157	95	98	63	109	132	102	66	114	113	93	174	192	212	120	206	124	129	90
female	22	217	96	330	344	1206	436	398	267	311	259	299	220	176	418	130	513	176	220	312	309	324	517	270	179
male	20	132	245	288	230	212	164	220	138	206	203	192	197	223	174	188	144	136	140	149	205	185	217	174	198
female	21	90	204	176	226	84	177	207	84	162	126	183	199	101	141	135	145	142	48	240	185	188	212	135	188
female	21	206	238	249	209	185	282	195	205	189	208	261	151	224	147	174	214	312	203	260	218	159	152	133	192
female	21	217	162	181	210	251	184	174	176	157	170	165	169	165	189	192	160	183	150	171	167	171	204	161	185
female	22	106	143	105	126	70	87	108	186	75	74	83	93	66	118	122	225	71	71	138	62	95	111	78	144
male	20	146	283	216	152	120	140	122	90	197	195	182	182	242	158	243	133	124	168	208	151	151	165	132	114
female	21	72	124	193	223	150	114	151	106	157	109	100	184	228	104	151	191	145	91	166	153	175	152	226	195
male	20	236	217	198	204	414	231	197	259	256	211	185	204	230	278	195	256	255	204	209	192	256	206	162	202
male	22	120	148	94	147	195	60	173	70	162	70	111	190	107	235	121	88	55	81	88	172	92	157	81	129
female	21	287	251	247	227	206	207	185	203	153	202	168	314	197	184	146	170	153	143	189	142	155	183	181	187
female	22	238	233	192	425	213	241	228	315	310	197	209	143	422	229	341	186	183	316	198	176	114	192	232	208
female	21	324	340	557	327	194	370	236	271	249	443	1067	682	890	177	620	1172	235	251	141	211	738	224	396	177
male	22	192	175	159	112	81	156	113	100	172	235	127	93	204	136	128	279	208	120	122	93	217	138	164	103
female	21	189	204	113	197	308	224	150	171	204	141	224	170	177	187	162	167	196	124	275	133	162	190	385	164
female	20	243	246	366	251	186	390	247	236	248	560	352	230	221	233	288	249	232	233	187	221	267	251	299	214
male	18	130	160	89	198	78	139	185	90	107	112	65	169	81	93	126	107	270	88	203	114	111	114	77	135
male	21	132	165	170	224	148	161	108	118	151	219	176	164	140	214	175	124	130	102	189	152	132	114	152	111
female	23	65	56	58	70	61	88	57	55	60	69	71	40	87	73	54	59	60	49	53	39	49	52	78	73
female	21	267	143	146	186	124	84	199	207	111	124	213	164	490	145	188	124	156	228	146	138	138	136	143	120
female	21	109	106	107	137	1222	110	162	121	118	143	238	224	122	159	923	650	153	137	561	94	163	299	113	120
male	20	37	33	42	34	34	32	25	32	32	33	32	30	29	40	34	42	28	33	33	35	32	30	28	42
female	21	106	170	142	171	195	246	135	127	179	308	109	139	160	164	249	299	258	133	201	135	128	89	300	96
female	21	42	43	49	39	35	47	27	48	40	45	41	35	38	49	44	34	46	40	52	42	51	34	33	43
male	20	104	117	128	215	218	252	308	175	111	608	284	158	270	218	141	211	191	96	226	117	163	260	147	214
male	20	174	145	384	142	130	165	136	213	177	119	157	246	129	147	127	130	150	140	146	98	114	122	118	119
female	21	208	241	226	204	184	204	209	236	164	249	258	254	198	246	145	202	225	357	275	234	204	194	224	191
male	19	225	202	216	283	544	251	345	223	188	486	542	330	245	347	146	328	454	256	232	166	256	504	217	233
male	22	145	182	164	181	81	217	105	141	158	177	186	190	233	129	232	265	192	181	251	218	144	165	168	202
male	21	145	151	219	163	345	226	154	236	297	235	193	183	216	216	227	212	88	153	229	117	147	104	125	108
female	21	133	162	356	206	186	127	202	141	163	95	126	153	87	135	159	212	103	103	164	221	124	94	101	102
female	21	237	155	243	368	176	331	196	235	217	156	184	197	274	332	256	308	233	205	191	173	211	123	171	172
male	20	78	54	170	115	57	102	119	69	127	118	89	84	137	99	75	132	99	75	70	85	115	85	91	58
male	20	157	197	236	175	147	236	147	210	151	158	173	204	184	176	204	200	202	251	182	207	191	186	156	203
male	22	209	172	152	135	165	160	203	233	241	180	176	211	191	162	187	249	148	80	157	177	133	95	145	159
female	21	246	251	302	191	309	375	238	247	229	271	299	269	258	227	267	300	253	193	221	212	166	261	177	218
female	20	101	160	242	113	342	210	172	123	183	146	134	110	254	239	123	145	191	305	122	107	165	157	127	157
male	22	172	95	180	193	141	110	96	111	158	128	113	130	133	116	108	116	142	136	142	114	101	140	108	106
male	22	122	167	96	188	68	763	141	242	286	75	303	87	217	222	99	136	207	77	130	127	117	92	336	126
female	21	167	193	126	122	107	110	191	128	125	96	208	138	154	198	98	125	215	74	123	162	111	75	77	117
female	21	104	200	176	221	115	134	199	258	142	181	144	246	97	176	79	167	163	125	145	141	217	212	133	175
female	21	112	213	184	139	179	148	190	143	129	147	132	133	151	149	159	139	117	119	245	102	187	127	200	191
female	22	238	223	267	252	213	228	214	272	271	276	242	231	354	220	223	216	228	217	230	219	202	211	226	164
female	21	214	146	186	179	196	195	174	202	179	192	149	190	193	237	166	202	220	187	237	157	134	170	157	142
female	21	157	101	281	178	129	172	133	118	147	176	117	149	136	200	142	132	215	273	118	74	157	117	127	160
female	21	356	215	223	180	184	436	318	199	410	128	148	427	241	359	283	288	236	248	170	247	256	276	157	221
male	21	232	233	167	211	150	188	168	145	154	219	238	199	210	135	176	189	145	151	178	142	128	124	172	139
male	21	215	190	271	220	194	212	192	311	188	300	242	164	224	179	249	281	340	251	285	152	238	195	189	180
male	20	150	152	117	166	188	179	157	107	96	100	151	123	127	121	126	135	191	130	89	99	158	160	153	144
male	19	124	129	170	117	165	206	200	175	162	115	133	157	151	181	103	291	233	243	124	100	120	122	142	147

## Sheet: perceptual fluency
gender	age	Bare1	Bare2	Bare3	Bare4	Bare5	Bare6	Bare7	Bare8	Foliage1	Foliage2	Foliage3	Foliage4	Foliage5	Foliage6	Foliage7	Foliage8	City1	City2	City3	City4	City5	City6	City7	City8
female	18	6.4	4.6	4	7	5.2	6.4	7	4.6	5.6	5.2	5.2	5	3.4	4.6	5.4	6.2	5.8	6	6	7	7	4	6.6	3.6
male	25	4.4	5.2	5.6	6.4	5	5.2	5.8	5.6	5.4	5.4	4.8	5.4	6	4.8	4	5.6	3.2	4	4	4.2	3.8	4	4	3.2
male	21	3.2	3	3	2.8	3.6	2.8	3	2.8	2.8	3.6	2.8	2.6	3.6	3	3.6	4.8	3.2	5	4.6	4.2	4.4	4.8	5.4	4.6
male	24	3	3.4	3.2	2	3	2.6	4.6	3.2	3.2	5.4	4.8	2	3	3	4.4	2.4	4.2	4.8	4.2	5.6	4.4	5.6	4.6	4.8
male	21	3.4	2.8	3.6	5	5.2	4.6	3.6	3.8	3.6	4.8	5.2	2.6	4.8	2.4	3.4	3.2	2.8	4	3.8	2.8	4	4.4	4.2	2
male	20	4.6	5.8	5.6	5.4	5.6	5.4	5.2	4.8	3.6	5.8	4.2	4.2	5.4	4.4	3.6	3.6	5.2	6.6	5.4	6.4	6.4	6.2	5.2	3.2
male	25	4	4	5	4.6	4.8	3.4	4.4	3.8	2.8	5.8	2.4	5.8	3.6	4.6	3	3.8	5.8	6.4	5.6	5.6	6	6.2	5.8	5.8
female	23	5.2	5.8	5.8	5.8	5.8	5	5.8	5.8	5.8	5.8	5.8	5.8	5.8	6.6	5.4	5.6	2.6	3.6	2.6	3.6	3.4	4.2	2.8	2.6
female	20	5.2	5.8	4.8	5.2	4.8	5.8	5.6	5.4	5.4	4.6	5.8	5.2	4	5	5.8	4.6	3.4	4.6	3.2	3.8	3.4	4	3.6	3.2
male	21	4.2	4	3.4	3.6	3.8	4	3.6	3.6	3.8	4	3.8	3.2	4	3.6	3.2	3.6	3.6	4.6	3.8	3.6	3.8	3.6	3.8	3.2
female	21	5.8	5.8	5.8	5.8	5.8	5.8	5.8	5.8	5.8	5.8	5.8	5.8	5.8	5.8	5.8	5.8	5.4	5.8	4.4	4	4.4	5.8	5.4	4
male	21	2.6	3.8	3.4	4.2	4.8	4.8	5.2	4.8	2.4	4.8	4.8	2.8	5.2	4.2	4	5.2	4.2	5.2	4.6	3.8	5	4.8	3.2	4.4
male	23	5.8	5.4	6.2	6	6.2	4.6	6	5.6	5.8	6.4	6	6	5	5.4	4.2	4.8	5	6.4	4.8	4.8	5.8	5.8	5.6	4.2
male	22	3.8	3.8	5.8	4.4	4	4.4	4	4.6	4.6	5.2	4	4.2	5	4.6	5	4	3.4	3	3.4	3.2	3	3.8	2.8	2.6
female	21	4	4.2	6	5.8	5.8	5	4.4	5.6	3.6	5.8	3	3.4	4	5.6	4.2	4	3.8	5.2	3.2	3.8	3.8	6	3.4	3.8
female	22	3.4	4.2	3.6	3.8	2.8	3.6	3.2	5.2	5.8	4.6	3	4.2	5.4	5	4.2	4.8	4.2	2.4	4	2.4	5.4	3.8	4.8	3.2
female	20	6	5.2	6.6	5.4	6.6	5.4	6	6.2	5.8	4.2	5.4	4.6	6.2	5.8	4.4	6.6	5.6	5.4	6.2	6.2	6.2	6.4	5.4	6
female	24	3.8	4.4	5.2	3	5.2	3	2.4	4.4	5	5.8	2.8	4	2.8	4.2	4.4	2.6	4.2	5.6	2.6	3	2.8	5.6	3	2
male	23	4.6	5.8	4.6	5.8	5.8	5.8	5.6	5.8	5.2	5.6	4	3.6	4.2	5.6	3.6	3.8	3	5.6	4	3	4.2	5	3.2	2.6
female	21	4.4	5.6	3.2	4	3	2.8	3.2	4.4	5.2	3.2	4	3	2.8	3.4	3.2	3.4	2.8	3.8	4.4	5	4.6	4.4	2.2	2.8
male	20	3.6	5.6	3.2	5.6	4	4.6	3.8	5.2	5	5	5.8	3.2	4	4.8	5.6	3	6	4.8	4	5.8	5	5.8	6.2	4.6
female	20	4.2	4.8	4.8	4	4.6	3.2	3.6	4.4	3.8	5.2	3.8	4.6	5.6	4.4	4	4.2	4.6	5.2	5.2	4.8	6	6	5.6	5.2
male	20	3.4	4.6	5	5.6	5	3.2	3	5.2	3.4	4.6	4.4	1.8	4.6	2.8	4	2.8	4.8	3	3.2	3.8	3.8	4.4	3.6	3.2
male	24	6	4.8	6	5.6	6	5.8	5.2	5.8	5.2	4.8	5	4.8	4.6	5.6	5	5.2	2.4	5.8	2.4	3.2	3.2	5.8	2.6	2.8
male	21	5.8	5.6	6.2	6	6.2	6.2	5.8	6	5	5.4	3.8	2.6	4.8	4	3.6	2.4	4.8	7	4.8	5.6	6.4	7	5.4	4
female	25	5.2	5	5.2	5	5.2	4	4.2	5	5.2	5.2	5	4.8	5.2	5.2	4.2	4.4	3.2	4.8	4	4.2	3	5.2	4.2	3.6
female	20	5.8	5.6	5.4	5.6	5.4	4	5.6	5.2	5	5	5.4	4.8	5.2	4.2	5.2	4.8	5.4	5.8	5.8	5.8	5.4	5.8	5.6	4.6
female	21	5.8	5.8	5.8	5.8	5.8	4.8	5.2	5.8	5	5.8	5.8	4.6	4.6	4.4	5	4.8	4.6	5.2	5.8	5.8	5.8	5.6	4.2	4.8
male	22	5.8	4.8	5.2	5.8	5.4	3.4	4.8	5.2	3.2	4.4	3.4	3.8	4.4	4.4	2.8	4	5	3	4.6	4.2	3	3.6	3.4	3.4
male	18	3.4	3.8	3	3.6	3.4	2.2	3.4	3	2.6	3.6	3	3.4	4	1.6	3.8	3.6	4.2	3.6	4.2	2.8	3.4	3	4	2.2
female	24	5.8	5.8	5.8	5.8	5.8	5.8	5.8	5.8	5.8	5.8	5.8	5.8	5.8	5.8	5.8	5.8	5.6	5.8	5.8	5.8	5.8	5.8	5.8	5.8
female	22	5.4	4.8	5.8	5.8	5.6	5.8	5.2	5.4	5.6	5.8	5	5.2	5.4	5.6	5.8	5.2	5.8	5.6	5.6	5.6	5.6	5.6	4.6	5.2
male	21	5	3	3.4	6	4.8	5	4	2	4	3	5	4	3	5	3	5	2	3	2	3	3	3	3	4
male	22	6.8	6	5.8	5.4	5.6	6.6	6.4	6.4	6	6.4	6.4	6	4.6	6.4	5.2	6.4	5.8	5.4	6.4	6.6	6.4	5.4	5.4	6
male	21	4.4	5.6	3.8	3.4	3	4.8	4	4	3.8	4.8	4	3	3.4	3.8	3.8	4	3	4	3	2.8	3.2	4	4.8	3.6
female	24	2.2	2	1.6	2.8	1.6	2.4	1.8	2	1.8	2.4	2.2	2.4	1.8	1.6	2	1.6	1.8	1.8	1.8	2	2	2.2	2.6	1.4
male	23	5.4	5.8	5	5.6	5.2	5.4	5.4	5.6	5.4	5.6	4.8	5.2	5.4	5.6	5.2	4.8	3.6	4.2	4	5	5.2	5	5	4
female	20	3.2	3.4	2.8	3.2	4.2	3	3.2	3.6	3.6	4	3.2	2.6	3	3.8	3.4	3.6	3.2	5	4.8	5	4.4	5.6	3.8	2.8
male	20	6.4	6.8	6.4	6	6.8	6	6.6	6.2	5.6	6.8	6.6	7	5.6	6	6.6	6.8	7	7	6.8	6.8	6.6	7	6.4	5.8
male	23	1	3	1.4	5.2	2.2	3	3.4	2.8	2.8	3.6	3.6	2.8	2.4	2.2	5.2	4.2	5.8	7	4.8	5.6	5.8	5.8	5.2	5.2
male	21	2.2	2.2	2.2	2.2	2.2	2.2	2.2	2.2	2.2	2.2	2.2	2.2	2.2	2.2	2.2	2.2	5.8	5.8	5.8	5.8	5.8	5.8	5.8	5.8
female	21	2.2	3.6	5.2	2.8	4.2	3.4	5.2	3.2	3.2	2.2	2.6	3.6	2.2	2.8	3.6	2.8	4.6	5.6	7	3.6	3.2	5.4	2.6	3.2
male	26	3	4.2	3.6	3.6	4	2.4	4	3.2	3.2	4.6	2.2	2.2	2.8	3.2	2.6	3	4.8	2.8	5.4	4.2	5	4.2	4.2	5.4
male	24	4.4	5.6	5.6	4.4	4	4	5	5.4	4.8	5.4	5	5.2	3.8	4.6	4.2	3.6	4.2	3.8	4.2	4.2	3.4	5.4	4.4	2.6
